# mangal – making complex ecological network analysis simpler

*Timothée Poisot et al. (see complete author list below)*

1 \*\*Author list: \**Timothée Poisot* (1,2), Benjamin Baiser (3), Jennifer A. Dunne (4,5), Sonia Kéfi (6), François Massol  
2 (7,8), Nicolas Mouquet (6), Tamara N. Romanuk (9), Daniel B. Stouffer (10), Spencer A. Wood (11,12), Dominique  
3 Gravel (1,2)

4 1. Université du Québec à Rimouski, Département de Biologie, 300 Allées des Ursulines, Rimouski (QC) G5L 3A1,  
5 Canada

6  
7 2. Québec Centre for Biodiversity Sciences, Montréal (QC), Canada

8  
9 3. Department of Wildlife Ecology and Conservation, University of Florida, Gainesville

10  
11 4. Sante Fe Institute, 1399 Hyde Park Road, Santa Fe NM 87501

12  
13 5. Pacific Ecoinformatics and Computational Ecology Lab, 1604 McGee Ave., Berkeley, CA 94703

14  
15 6. Institut des Sciences de l'Évolution, UMR CRNS 5554, Université Montpellier 2, 3405 Montpellier, France

16  
17 7. Laboratoire Génétique et Evolution des Populations Végétales, CNRS UMR 8198, Université Lille 1, Bâtiment  
18 SN2, F-59655 Villeneuve d'Ascq cedex, France

19  
20 8. UMR 5175 CEFE – Centre d'Ecologie Fonctionnelle et Evolutive (CNRS), 1919 Route de Mende, F-34293 Mont-  
21 pellier cedex 05, France

22  
23 9. Department of Biology, Dalhousie University

24  
25 10. University of Canterbury, School of Biological Sciences, Christchurch, New Zealand

1

2 11. Natural Capital Project, School of Environmental and Forest Sciences, University of Washington, Seattle, WA  
3 98195, USA

4

5 12. Department of Biological Sciences, Idaho State University, Pocatello, ID 83209, USA

6 **Author for correspondence:** [t.poisot@gmail.com](mailto:t.poisot@gmail.com).

1 **Short title:** Automated retrieval of ecological networks data

2 **Keywords:** R, API, database, open data, ecological networks, species interactions

3 The study of ecological networks is severely limited by (i) the difficulty to access data, (ii) the lack of a  
4 standardized way to link meta-data with interactions, and (iii) the disparity of formats in which ecologi-  
5 cal networks themselves are represented. To overcome these limitations, we conceived a data specification  
6 for ecological networks. We implemented a database respecting this standard, and released a R package (  
7 `rmanga1`) allowing users to programmatically access, curate, and deposit data on ecological interactions. In  
8 this article, we show how these tools, in conjunctions with other frameworks for the programmatic manipu-  
9 lation of open ecological data, streamlines the analysis process, and improves applicability and reproducibility  
10 of ecological networks studies.

## 1 Introduction

2 Ecological networks enable ecologists to accommodate the complexity of natural communities, and to discover mech-  
3 anisms contributing to their persistence, stability, resilience, and functioning. Most of the “early” studies of ecological  
4 networks were focused on understanding how the structure of interactions within one location affected the ecological  
5 properties of this local community. Such analyses revealed the contribution of ‘average’ network properties, such as the  
6 buffering impact of modularity on species loss (Pimm *et al.* 1991, ), the increase in robustness to extinctions along with  
7 increases in connectance (Dunne *et al.* 2002), and the fact that organization of interactions maximizes biodiversity (Bas-  
8 tolla *et al.* 2009). More recently, new studies introduced the idea that networks can vary from one realization to another.  
9 They can be meaningfully compared, either to understand the importance of environmental gradients on the realization of  
10 ecological interactions [@tylianakis\_habitat\_2007], or to understand the mechanisms behind variation in the structure of  
11 ecological networks (Poisot *et al.* 2012). Yet, meta-analyses of a large number of ecological networks are still extremely  
12 rare, and most of the studies comparing several networks do so within the limit of particular systems (Schleuning *et al.*  
13 2011; Dalsgaard *et al.* 2013). The severe shortage of data in the field also restricts the scope of large-scale analyses.

14 An increasing number of approaches are being put forth to *predict* the structure of ecological networks, either relying on  
15 latent variables (Rohr *et al.* 2010) or actual traits (Gravel *et al.* 2013). Such approaches, so as to be adequately calibrated,  
16 require easily accessible data. Comparing the efficiency of different methods is also facilitated if there is an homogeneous  
17 way of representing ecological interactions, and the associated metadata. In this paper, we (i) establish the need of a data  
18 specification serving as a *lingua franca* among network ecologists, (ii) describe this data specification, and (iii) describe  
19 `rmanga.l`, a R package and companion database relying on this data specification. The `rmanga.l` package allows to easily  
20 retrieve, but also deposit, ecological interaction networks data from a database. We provide some use cases showing how  
21 this new approach makes complex analyzes simpler, and allows for the integration of new tools to manipulate biodiversity  
22 resources.

## 23 Networks need a data specification

24 Ecological networks are (often) stored as an *adjacency matrix* (or as the quantitative link matrix), that is a series of 0 and 1  
25 indicating, respectively, the absence and presence of an interaction. This format is extremely convenient for *use* (as most  
26 network analysis packages, *e.g.* `bipartite`, `betalink`, `foodweb`, require data to be presented this way), but is extremely  
27 inefficient at *storing* meta-data. In most cases, an adjacency matrix informs on the identity of species (in cases where  
28 rows and columns headers are present), and the presence or absence of interactions. If other data about the environment  
29 (*e.g.* where the network was sampled) or the species (*e.g.* the population size, trait distribution, or other observations) are

1 available, they are most either given in other files, or as accompanying text. In both cases, making a programmatic link  
2 between interaction data and relevant meta-data is difficult and error-prone.

3 By contrast, a data specification (*i.e.* a set of precise instructions detailing how each object should be represented) provides  
4 a common language for network ecologists to interact, and ensure that, regardless of their source, data can be used in a  
5 shared workflow. Most importantly, a data specification describes how data are *exchanged*. Each group retains the ability  
6 to store the data in the format that is most convenient for in-house use, and only needs to provide export options (*e.g.*  
7 through an API, *i.e.* a programmatic interface running on a webserver, returning data in response to queries in a pre-  
8 determined language) respecting the data specification. This approach ensures that *all* data can be used in meta-analyses,  
9 and increases the impact of data (Piwowar *et al.* 2007; Piwowar & Vision 2013).

## 10 Elements of the data specification

11 The data specification (Fig. 1) is built around the idea that (ecological) networks are collections of relationships between  
12 ecological objects, each element having particular meta-data associated. In this section, we detail the way networks  
13 are represented in the mangal specification. An interactive webpage with the elements of the data specification can be  
14 found online at <http://mangal.uqar.ca/doc/spec/>. The data specification is available either at the API root (*e.g.*  
15 <http://mangal.uqar.ca/api/v1/?format=json>), or can be viewed using the `whatIs` function from the R package  
16 (see *Supp. Mat. 1*). Rather than giving an exhaustive list of the data specification (which is available online at the  
17 aforementioned URL), this section serves as an overview of each element, and how they interact.

18 We propose JSON, a format equivalent to XML, as an efficient way to uniformise data representation for two main reasons.  
19 First, it has emerged as a *de facto* standard for web platform serving data, and accepting data from users. Second, it allows  
20 *validation* of the data: a JSON file can be matched against a scheme, and one can verify that it is correctly formatted (this  
21 includes the possibility that not all fields are filled, as will depend on available data). Finally, JSON objects are easily  
22 and cheaply (memory-wise) parsed in the most common programming languages, notably R (equivalent to `list`) and  
23 python (equivalent to `dict`). For most users, the format in which data are transmitted is unimportant, as the interaction  
24 happens within R – as such, knowing how JSON objects are organized is only useful for those who want to interact with  
25 the API directly. The `rmangal` package takes care of converting the data into the correct JSON format to upload them in  
26 the database.

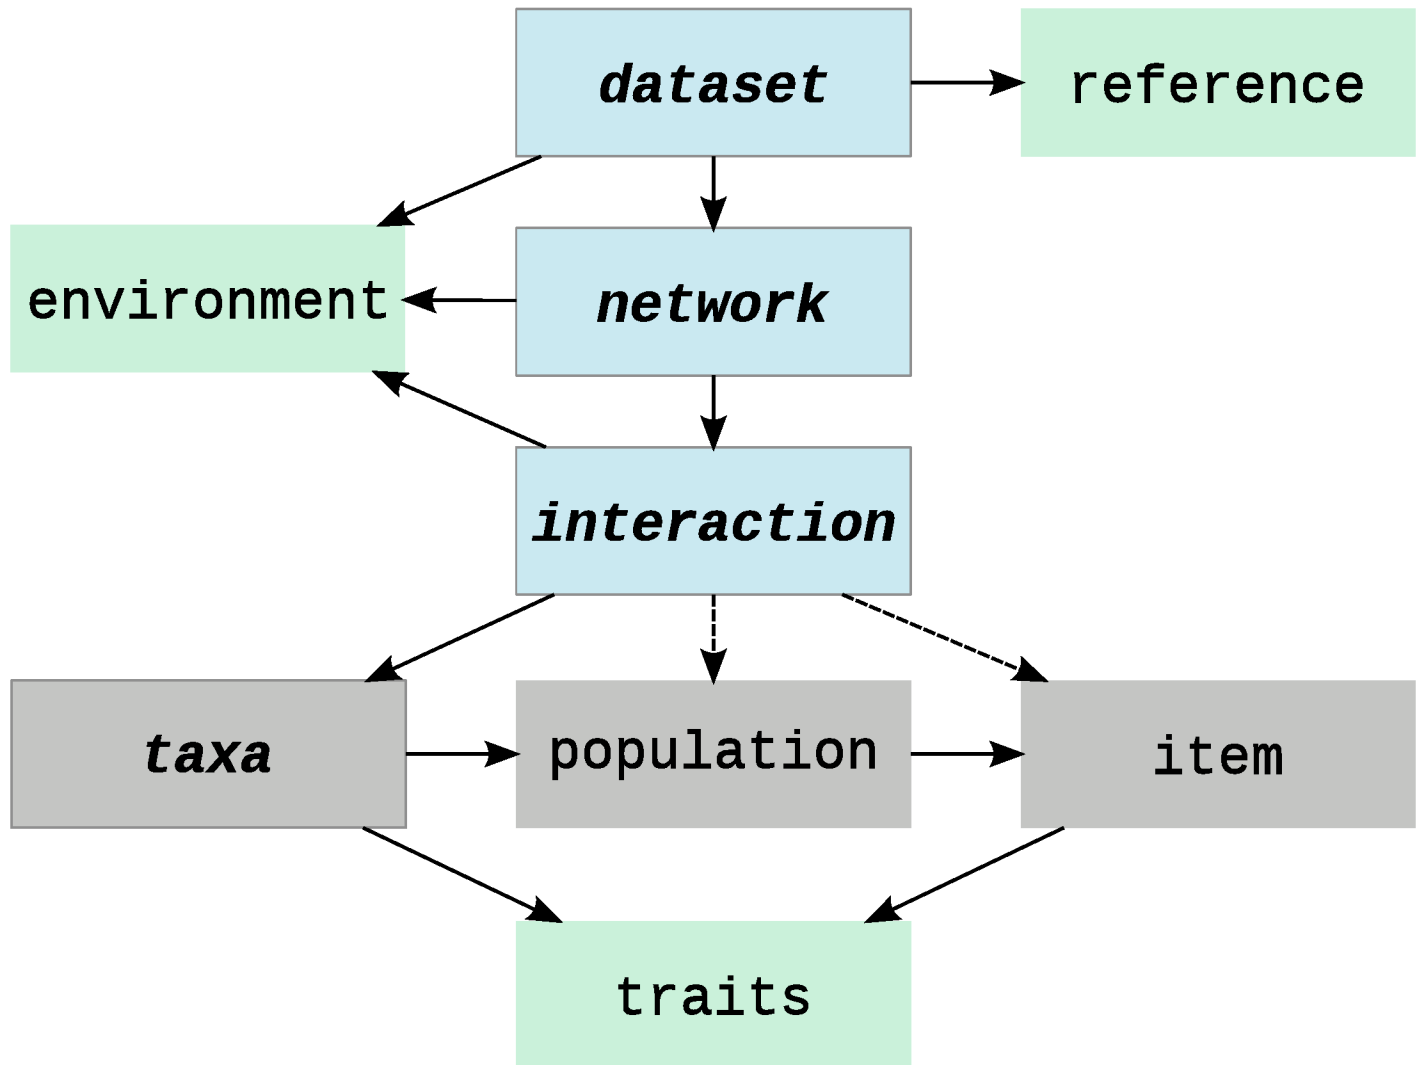

Fig. 1: An overview of the data specification, and the hierarchy between objects. Each box correspond to a level of the data specification. Grey boxes are nodes, blue boxes are interactions and networks, and green boxes are meta-data. The **bold** boxes (*dataset*, *network*, *interaction*, *taxa*) are the minimal elements needed to represent a network.

## 1 Node information

### 2 Taxa

3 Taxa are a taxonomic entity of any level, identified by their name, vernacular name, and their identifiers in a variety of  
4 taxonomic services. Associating the identifiers of each taxa is important to leverage the power of the new generation of  
5 open data tools, such as `taxize` [`@chamberlain_taxize_2013`]. The data specification currently has fields for `ncbi`, `gbif`,  
6 `itis`, `eol` and `bold` identifiers. We also provide the taxonomic status, *i.e.* whether a taxa is a true taxonomic entity, a  
7 “trophic species”, or a morphospecies.

### 8 Population

9 A `population` is one observed instance of a `taxa` object. If your experimental design is replicated through space, then  
10 each `taxa` have a `population` object corresponding to each locality. Populations do not have associated meta-data, but  
11 serve as “containers” for `item` objects.

### 12 Item

13 An `item` is an instance of a `population`. Items have a `level` argument, which can be either `individual` or `population`;  
14 this allows to represent both individual-level networks (*i.e.* there are as many `items` attached to a `population` than there  
15 were individuals of this `population` sampled), and population-level networks. When `item` represents a `population`, it  
16 is possible to give a measure of the size of this `population`. The notion of `item` is particularly useful for time-replicated  
17 designs: each observation of a `population` at a time-point is an `item` with associated `trait` values, and possibly `population`  
18 `size`.

## 19 Network information

### 20 Interaction

21 An `interaction` links, *a minima*, two `taxa` objects (but can also link pairs of `populations` or `items`). The most  
22 important attributes of `interactions` are the type of interaction (of which we provide a list of possible values, see *Supp.*  
23 *Mat. 1*), and its nature, *i.e.* how it was observed. This field help differentiate direct observations, text mining, and  
24 inference. Note that the `nature` field can also take `absence` as a value; this is useful for, *e.g.*, “cafeteria” experiments in  
25 which there is high confidence that the interaction did not happen.

## 1 **Network**

2 A network is a series of interaction object, along with (i) informations on its spatial position (provided at the latitude  
3 and longitude), (ii) the date of sampling, and (iii) references to measures of environmental conditions.

## 4 **Dataset**

5 A dataset is a collection of one or several network(s). Datasets also have a field for data and papers, both of which  
6 are references to bibliographic or web resources describing, respectively, the source of the data, and the papers in which  
7 these data have been significantly used. Datasets are the preferred entry point in the resources.

## 8 **Meta-data**

## 9 **Trait value**

10 Objects of type `item` can have associated trait values. These consist in the description of the trait being measured, the  
11 value, and the units in which the measure was taken.

## 12 **Environmental condition**

13 Environmental conditions are associated to datasets, networks, and interactions objects, to allow for both macro and micro  
14 environmental conditions. These are defined by the environmental property measured, its value, and the units.

## 15 **References**

16 References are associated to datasets. They accommodate the DOI, JSON or PubMed identifiers, or a URL. When  
17 possible, the DOI should be preferred as it offers more potential to interact with other on-line tools, such as the *CrossRef*  
18 API.

## 19 **Use cases**

20 In this section, we present use cases using the `rmangal` package for R, to interact with a database implementing this data  
21 specification, and serving data through an API (<http://mangal.uqar.ca/api/v1/>). It is possible for users to deposit  
22 data into this database, through the R package. Data are made available under a *CC-0 Waiver* (Poisot *et al.* 2013). Detailed  
23 informations about how to upload data are given in the vignettes and manual of the `rmangal` package. So as to save room



1 in the manuscript, we source each example; the complete `r` files to reproduce the examples of this section are attached as  
2 *Suppl. Mat.*. In addition, the `rmangal` package comes with vignettes explaining how users can upload their data into the  
3 database, through R.

4 The data we use for this example come from Ricciardi et al. (2010). These were previously available on the *Interaction-*  
5 *Web DataBase* as a single `xls` file. We uploaded them in the `mangal` database at <http://mangal.uqar.ca/api/v1/dataset/1>.

## 6 **Link-species relationships**

7 In the first example, we visualize the relationship between the number of species and the number of interactions, which  
8 Martinez (1992) propose to be linear (in food webs).

```
source("usecases/1_ls.r")
```

9 Producing this figure requires less than 10 lines of code. The only information needed is the identifier of the network  
10 or dataset, which we suggest should be reported in publications as: “These data were deposited in the `mangal` format  
11 at `<URL>/api/v1/dataset/<ID>`”, possibly in the acknowledgements. So as to encourage data sharing, we encourage  
12 users of the database to cite the original dataset or publication.

## 13 **Network beta-diversity**

14 In the second example, we use the framework of network  $\beta$ -diversity (Poisot *et al.* 2012) to measure the extent to which  
15 networks that are far apart in space have different interactions. Each network in the dataset has a latitude and longitude,  
16 meaning that it is possible to measure the geographic distance between two networks.

17 For each pair of network, we measure the geographic distance (in km.), the species dissimilarity ( $\beta_S$ ), the network dissim-  
18 ilarity when all species are present ( $\beta_{WN}$ ), and finally, the network dissimilarity when only shared species are considered  
19 ( $\beta_{OS}$ ).

```
source("usecases/2_beta.r")
```

20 As shown in *Fig. XX*, while species dissimilarity and overall network dissimilarity increase when two networks are far  
21 apart, this is not the case for the way common species interact. This suggests that in this system, network dissimilarity  
22 over space is primarily driven by species turnover. The ease to gather both raw interaction data and associated meta-data  
23 make producing this analysis extremely straightforward.

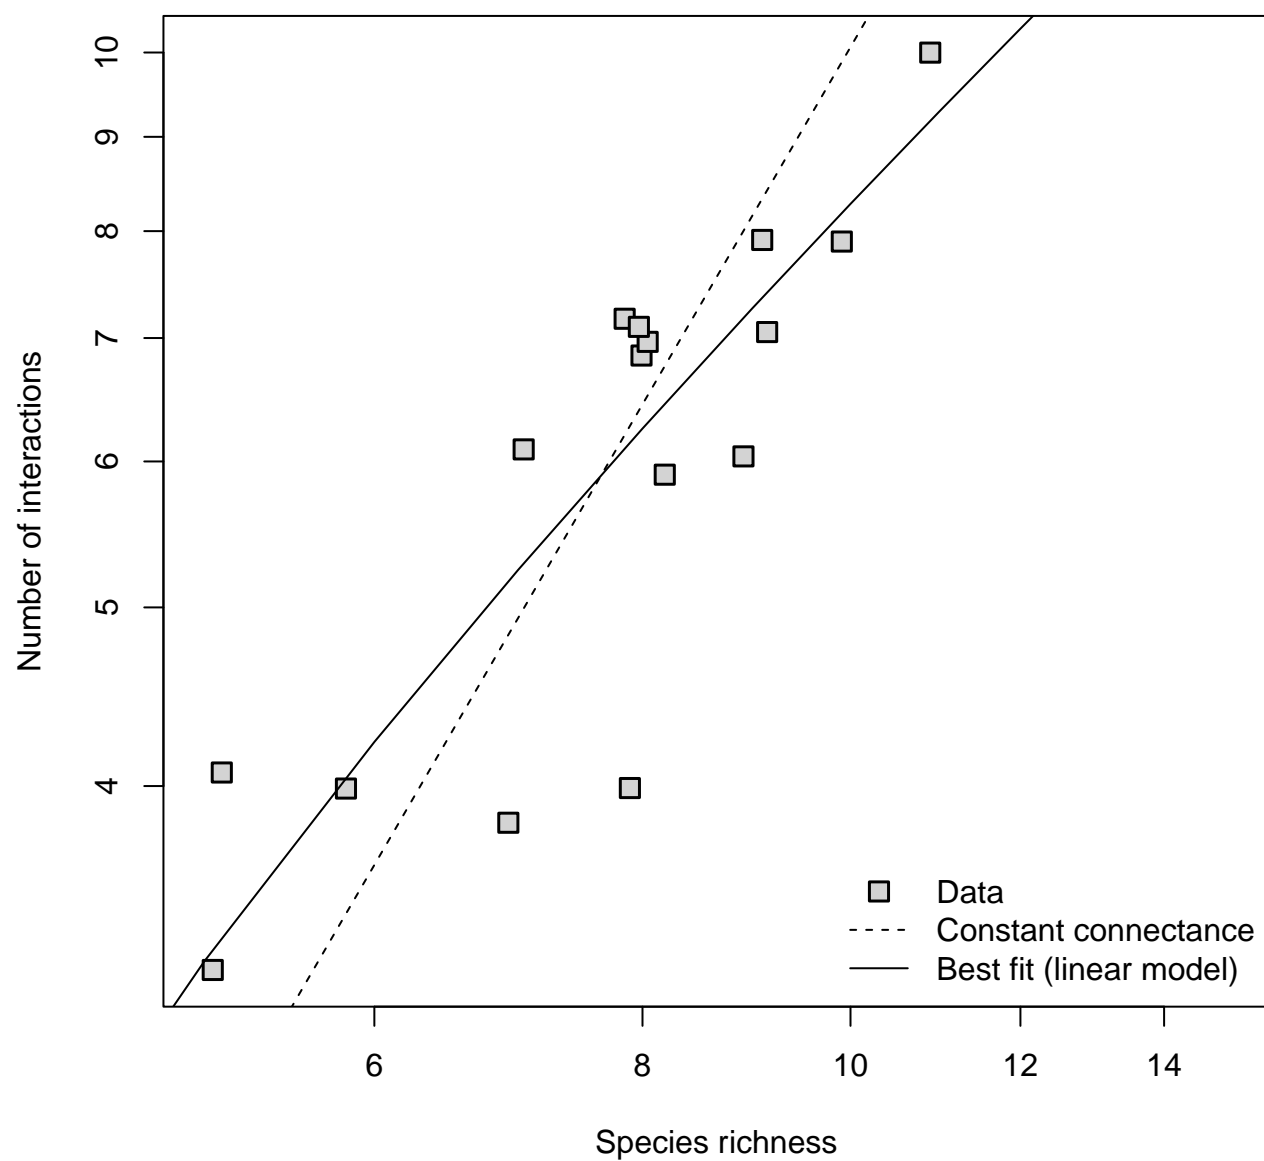

Fig. 2: Relationship between the number of species and number of interactions in the anemonefish-fish dataset.

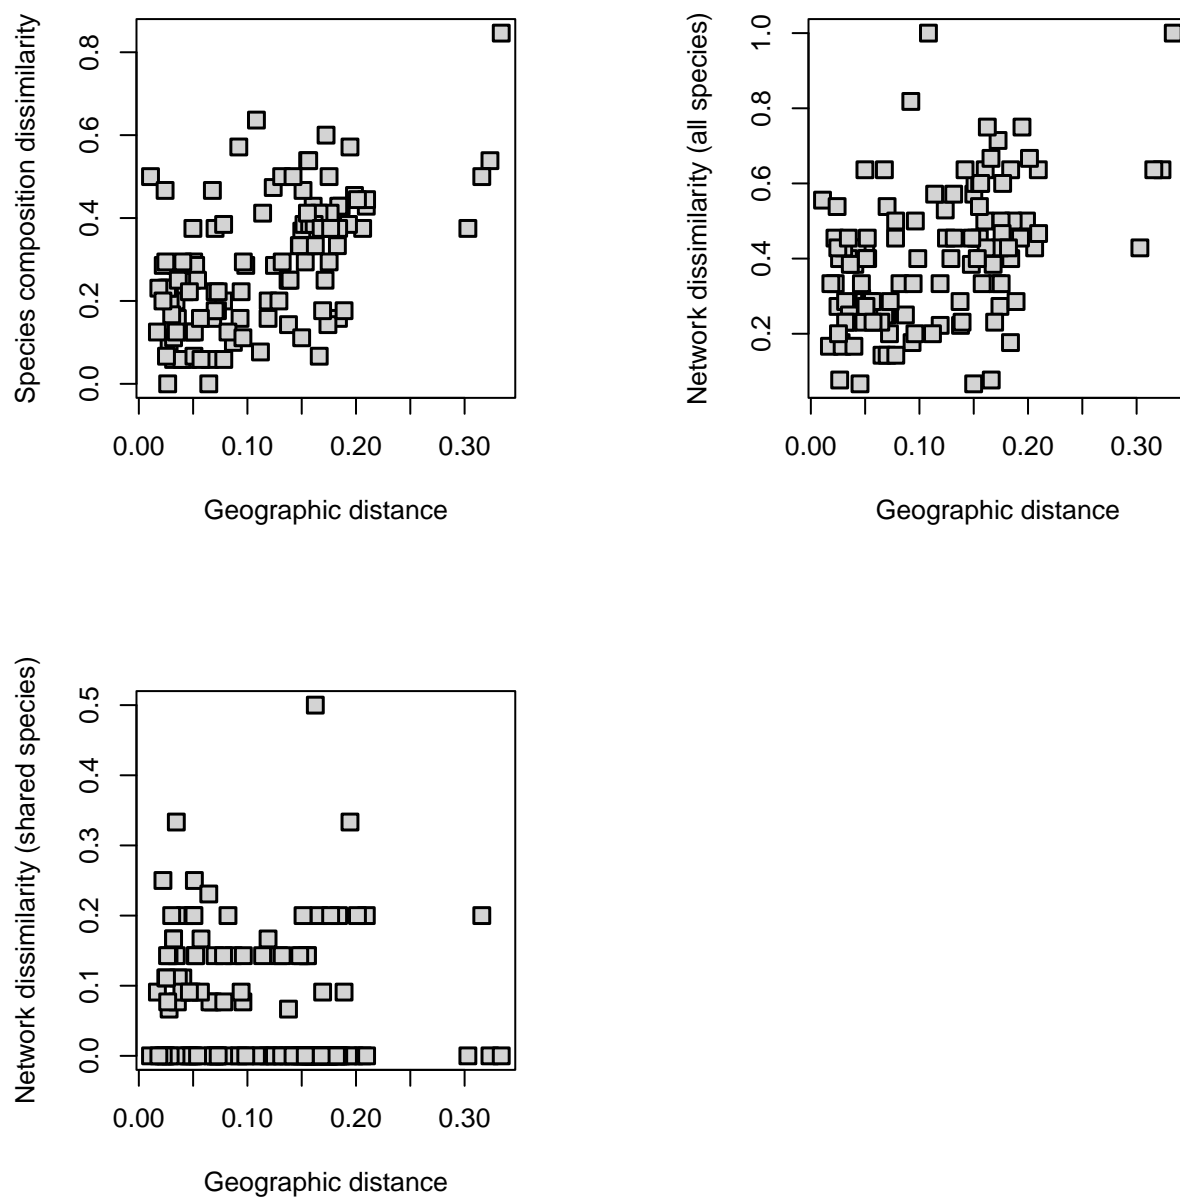

Fig. 3: Relationships between the geographic distance between two sites, and the species dissimilarity, network dissimilarity with all, and only shared, species.

## 1 Spatial visualization of networks

2 Bascompte (2009) uses an interesting visualization for spatial networks, in which each species is laid out on a map at the  
3 center of mass of its distribution; interactions are then drawn between species to show how species distribution determines  
4 biotic interactions. In this final use case, we propose to reproduce a similar figure.

```
source("usecases/3_spatial.r")
```

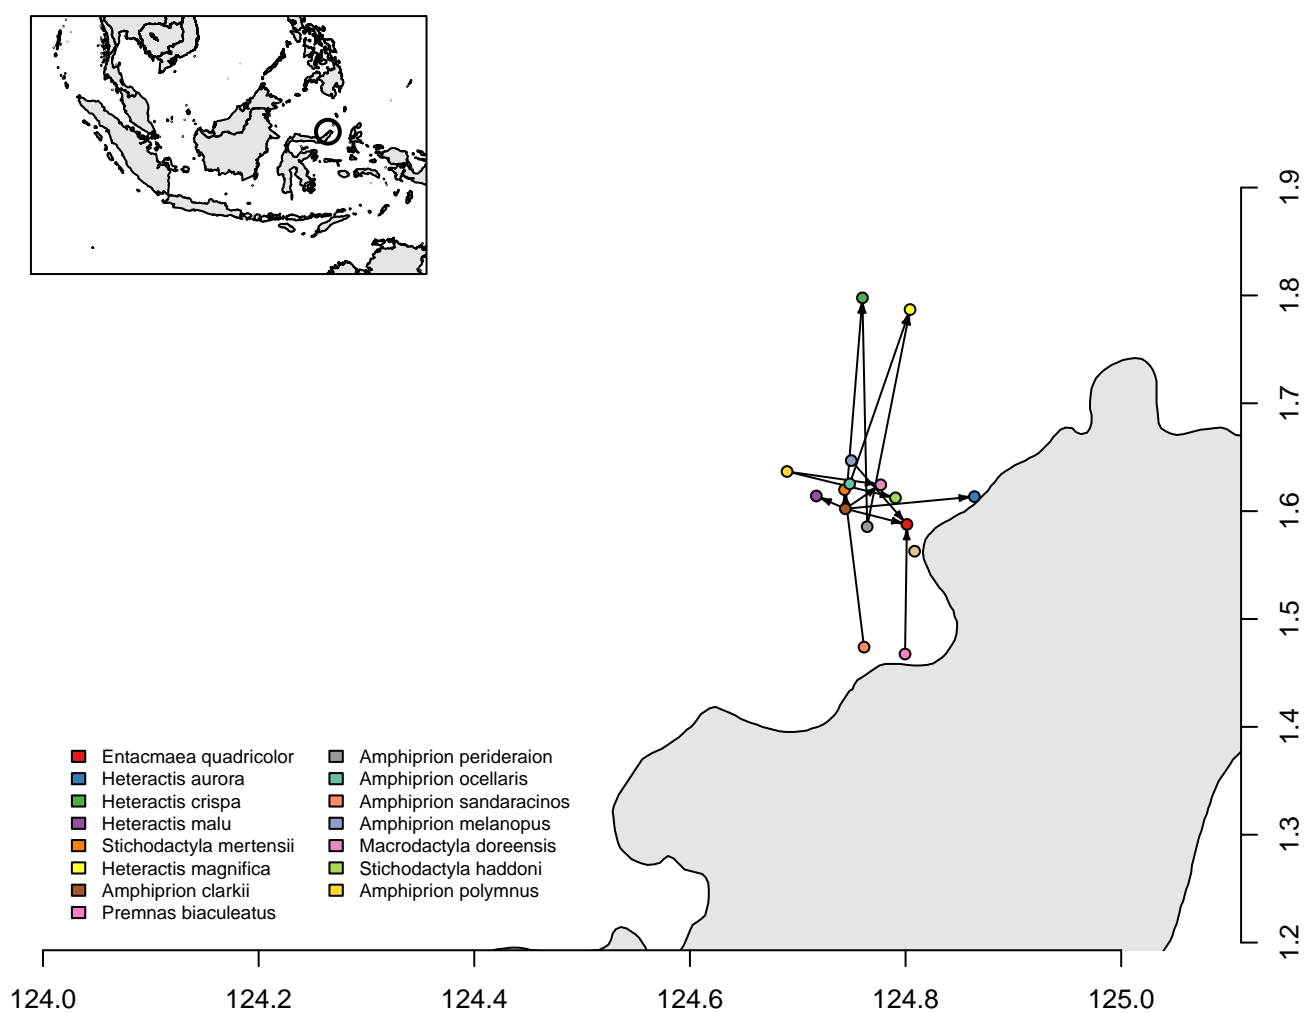

Fig. 4: Spatial plot of a network, using the maps and rmanga1 packages. The circle in the inset map show the location of the sites. Each dot in the main map represents a species, with interactions drawn between them.

## 1 Conclusions

2 In this contribution, we presented mangal, a data format for the exchange of ecological networks and associated meta-  
3 data. We deployed an online database with an associated API, relying on this data specification. Finally, we introduced  
4 rmangal, a R package designed to interact with APIs using the mangal format. We expect that the data specification  
5 will evolve based on the needs of the community. At the moment, users are welcome to propose such changes on the  
6 project issue page: <https://github.com/mangal-wg/mangal-schemes/issues>. A python wrapper for the API is  
7 also available at <http://github.com/mangal-wg/pymangal/>.

## 8 References

- 9 Bascompte, J. (2009). Disentangling the web of life. *Science (New York, N.Y.)*, **325**, 416–9.
- 10 Bastolla, U., Fortuna, M.A., Pascual-García, A., Ferrera, A., Luque, B. & Bascompte, J. (2009). The architecture of  
11 mutualistic networks minimizes competition and increases biodiversity. *Nature*, **458**, 1018–1020.
- 12 Dalsgaard, B., Trøjelsgaard, K., González, A.M.M., Nogués-Bravo, D., Ollerton, J., Petanidou, T., Sandel, B., Schleuning,  
13 M., Wang, Z., Rahbek, C., Sutherland, W.J., Svenning, J.-C. & Olesen, J.M. (2013). Historical climate-change influences  
14 modularity and nestedness of pollination networks. *Ecography*, no–no. Retrieved May 14, 2013,
- 15 Dunne, J.A., Williams, R.J. & Martinez, N.D. (2002). Network structure and biodiversity loss in food webs: robustness  
16 increases with connectance. *Ecology Letters*, **5**, 558–567.
- 17 Gravel, D., Poisot, T., Albouy, C., Velez, L. & Mouillot, D. (2013). Inferring food web structure from predator-prey body  
18 size relationships. *Methods in Ecology and Evolution*.
- 19 Martinez, N.D. (1992). Constant connectance in community food webs. *The American Naturalist*, **139**, 1208–1218.
- 20 Pimm, S.L., Lawton, J.H. & Cohen, J.E. (1991). Food web patterns and their consequences. *Nature*, **350**, 669–674.
- 21 Piwowar, H.A. & Vision, T.J. (2013). Data reuse and the open data citation advantage. *PeerJ*, **1**. Retrieved October 05,  
22 2013,
- 23 Piwowar, H.A., Day, R.S. & Fridsma, D.B. (2007). Sharing detailed research data is associated with increased citation  
24 rate. (J. Ioannidis, Ed.). *PloS one*, **2**, e308.
- 25 Poisot, T., Canard, E., Mouillot, D., Mouquet, N. & Gravel, D. (2012). The dissimilarity of species interaction networks.  
26 *Ecology Letters*, **15**, 1353–1361.
- 27 Poisot, T., Mounce, R. & Gravel, D. (2013). Moving toward a sustainable ecological science: don't let data go to waste!

- 1 Ricciardi, F., Boyer, M. & Ollerton, J. (2010). Assemblage and interaction structure of the anemonefish-anemone mutual-  
2 ism across the Manado region of Sulawesi, Indonesia. *Environmental Biology of Fishes*, **87**, 333–347. Retrieved January  
3 10, 2014,
- 4 Rohr, R.P., Scherer, H., Kehrli, P., Mazza, C. & Bersier, L.-F. (2010). Modeling food webs: exploring unexplained  
5 structure using latent traits. *The American naturalist*, **176**, 170–7.
- 6 Schleuning, M., Blüthgen, N., Flörchinger, M., Braun, J., Schaefer, H.M. & Böhning-Gaese, K. (2011). Specialization  
7 and interaction strength in a tropical plant-frugivore network differ among forest strata. *Ecology*, **92**, 26–36.
- 8 Yodzis, P. (1981). The stability of real ecosystems. *Nature*, **289**, 674–676.
